# Supplementary material for: Direct chemical dynamics simulations of CN− + CH3I bimolecular nucleophilic substitution reaction
Source: Royal Society of Chemistry journal article supplement (doi:10.1039/d3cp01849k), 2023-01-01
Supplement: d3cp01849k1.pdf [file d3cp01849k1.pdf]

Direct Chemical Dynamics Simulations of  
 $\text{CN}^- + \text{CH}_3\text{I}$  Bimolecular Nucleophilic  
Substitution Reaction  
SUPPORTING INFORMATION

Akash Gutal and Manikandan Paranjothy\*

*Department of Chemistry, Indian Institute of Technology Jodhpur, Jodhpur, Rajasthan,  
India*

E-mail: [pmanikandan@iitj.ac.in](mailto:pmanikandan@iitj.ac.in)

Phone: +91 291 280 1306. Fax: +91 291 251 6823

# Product Energy Distributions

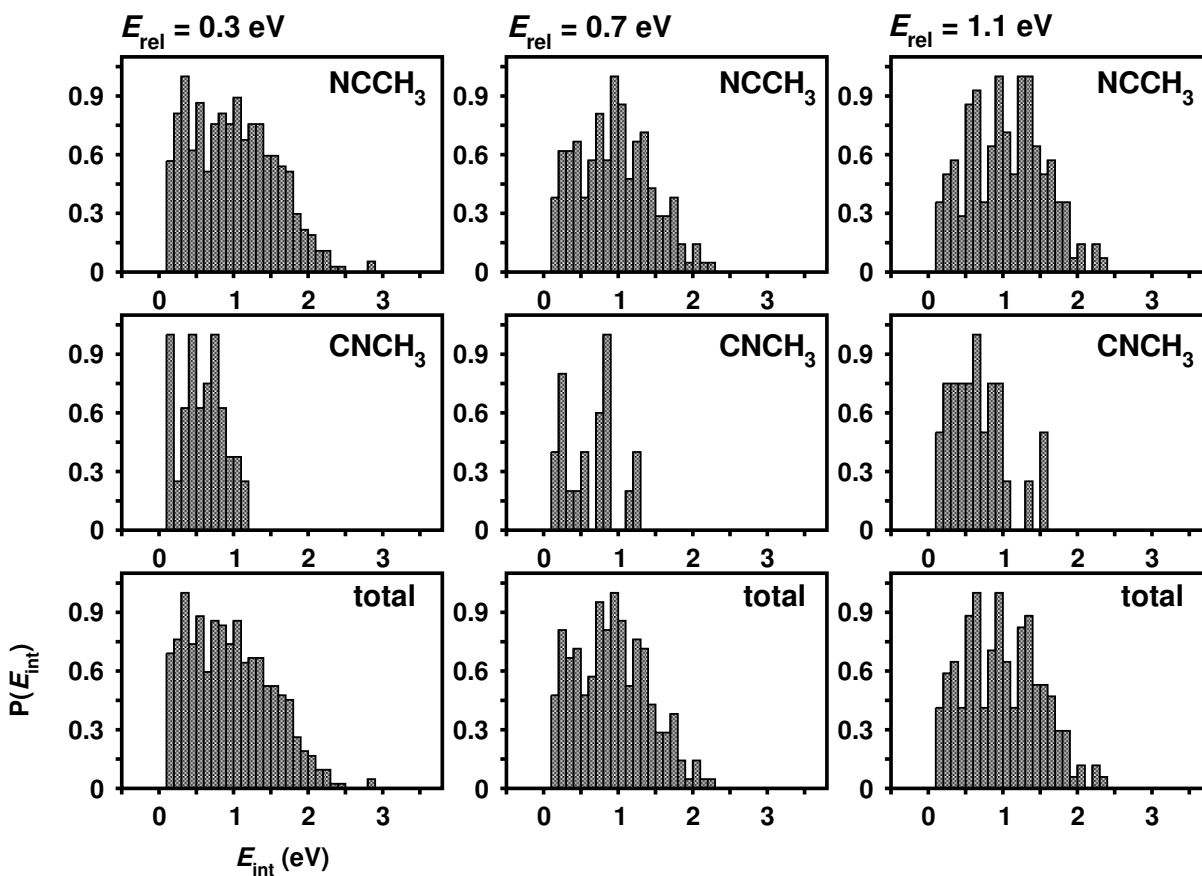

Figure S1: Product energy distributions for  $\text{NCCH}_3$  (top row),  $\text{CNCH}_3$  (middle row), and both isomers combined (bottom row) are given.

## Isomerization Energy Profile

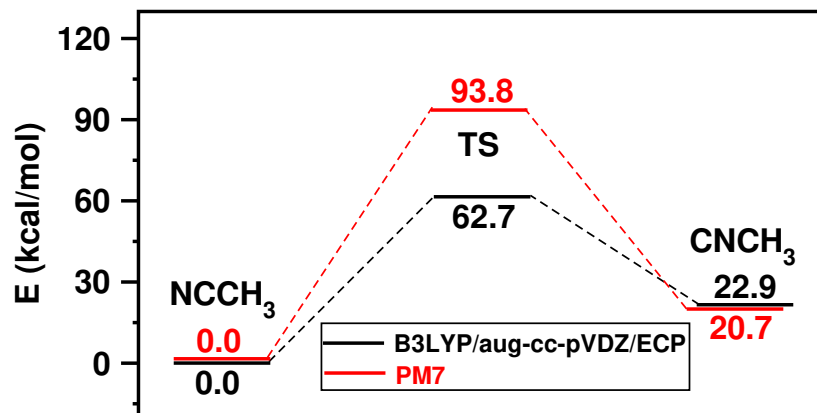

Figure S2:  $\text{NCCH}_3 \rightleftharpoons \text{CNCH}_3$  isomerization energy profile computed using B3LYP/aug-cc-pVDZ/ECP (black) and semi-empirical (red) methods.

**Table S1: Number of reactive trajectories as a function of impact parameter  $b$  at collision energies  $E_{\text{rel}} = 0.3$  and 1.1 eV. A total of 100 trajectories were generated at each  $b$ .**

| 0.3 eV  |            | 1.1 eV  |            |
|---------|------------|---------|------------|
| $b$ (Å) | reactivity | $b$ (Å) | reactivity |
| 0       | 9          | 0       | 2          |
| 1       | 5          | 1       | 5          |
| 2       | 5          | 2       | 6          |
| 3       | 4          | 3       | 0          |
| 4       | 4          | 4       | 1          |
| total   | 27         | total   | 14         |

**Table S2: A comparison of stationary point energies (in kcal/mol) for  $\text{CN}^- + \text{CH}_3\text{I}$  reaction computed using B3LYP/aug-cc-pVDZ/ECP and Semiempirical method.**

| Stationary point                                                     | DFT (B3LYP) | SEMI-EM (PM7) |
|----------------------------------------------------------------------|-------------|---------------|
| $\text{CH}_3\text{I} + \text{CN}^- / \text{NC}^-$                    | 0           | 0             |
| $\text{CN}^- \cdots \text{HCH}_2\text{I}$                            | -9.73       | -8.82         |
| $[\text{CN} \cdots \text{H} \cdots \text{CH}_2\text{I}]^{\ddagger-}$ | 38.12       | 16.71         |
| $\text{HNC} + \text{CH}_2\text{I}^-$                                 | 51.33       | 21.32         |
| $[\text{CN} \cdots \text{CH}_3 \cdots \text{I}]^{\ddagger-}$         | -5.63       | -5.65         |
| $\text{CNCH}_3 \cdots \text{I}^-$                                    | -38.22      | -61.02        |
| $\text{CNCH}_3 + \text{I}^-$                                         | -27.76      | -55.59        |
| $\text{NC}^- \cdots \text{CH}_3\text{I}$                             | -10.05      | -9.91         |
| $\text{NC}^- \cdots \text{HCH}_2\text{I}$                            | -9.25       | -9.41         |
| $[\text{NC} \cdots \text{H} \cdots \text{CH}_2\text{I}]^{\ddagger-}$ | 31.08       | 4.87          |
| $\text{HCN} + \text{CH}_2\text{I}^-$                                 | 37.79       | 12.32         |
| $[\text{NC} \cdots \text{CH}_3 \cdots \text{I}]^{\ddagger-}$         | -8.84       | -9.48         |
| $\text{NCCH}_3 \cdots \text{I}^-$                                    | -60.88      | -84.24        |
| $\text{NCCH}_3 + \text{I}^-$                                         | -50.61      | -76.28        |

# Trajectory Snapshots

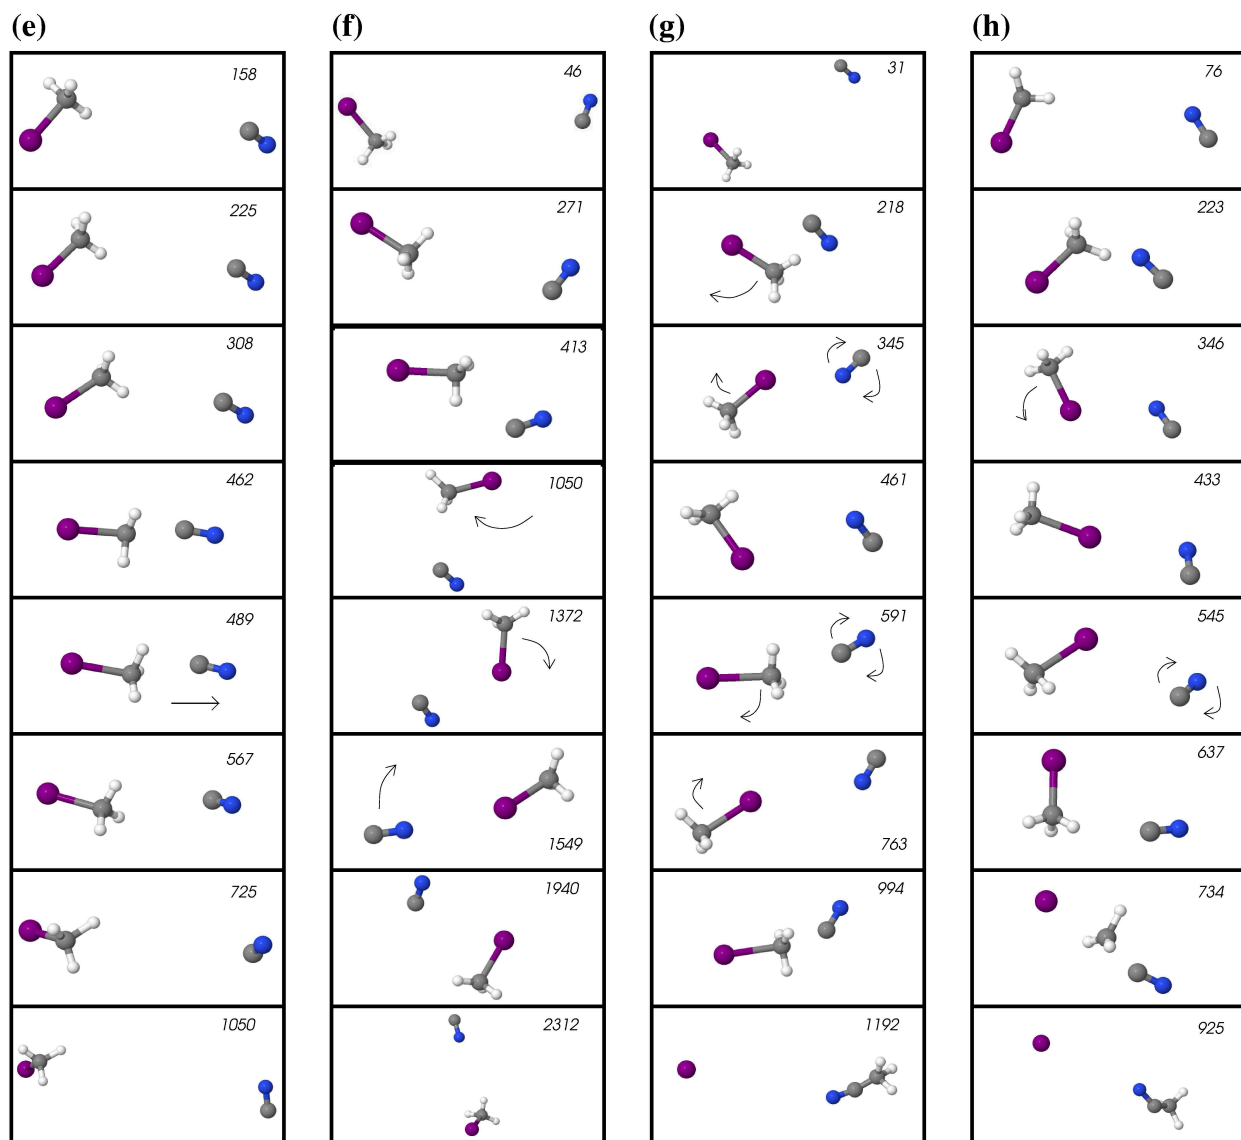

Figure S3: Trajectory snapshots for  $\text{CH}_3\text{I} + \text{CN}^-$  reaction for DFT(e,f) and semiempirical (g,h) direct dynamics. **Unreactive:** (e) Direct (f) Indirect mechanism. **Reactive:** (g,h) Direct roundabout mechanism.

# Optimized Geometries

Stationary point geometries optimized using B3LYP/aug-cc-pVDZ/ECP and PM7 methods.

Coordinates are given in Angstrom units.

## 1. CH<sub>3</sub>I

*DFT*

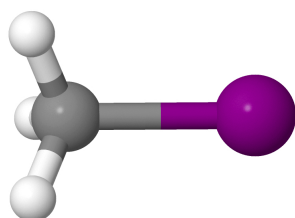

```
C 0.000000 0.000000 1.770758
H 0.726000 0.726000 2.133759
H 0.265734 -0.991734 2.133759
H -0.991734 0.265734 2.133759
I -0.000000 -0.000000 -0.321242
```

*PM7*

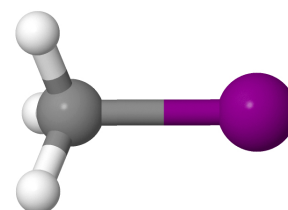

```
C 0.621400 0.886300 -1.570500
H 1.712700 0.886300 -1.570500
H 0.249700 1.912400 -1.570500
H 0.249600 0.356000 -2.448900
I -0.076400 -0.108900 0.193000
```

## 2. CN<sup>-</sup>

*DFT*

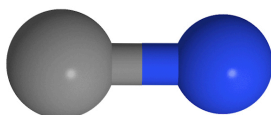

```
C 0.000000 0.000000 -0.623538
N 0.000000 0.000000 0.534462
```

*PM7*

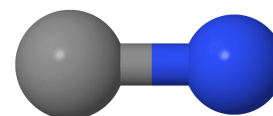

```
C -0.630200 0.000000 0.000000
N 0.540400 0.000000 0.000000
```

### 3. $\text{NC}^- \cdots \text{CH}_3\text{I}$

*DFT*

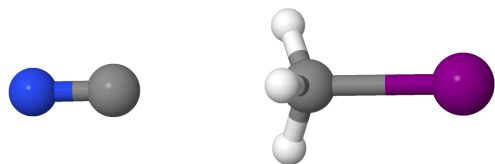

|   |           |           |           |
|---|-----------|-----------|-----------|
| C | 0.011109  | -0.963580 | 0.000832  |
| I | -0.001264 | 1.270245  | -0.000058 |
| C | -0.001301 | -3.802293 | 0.000912  |
| N | -0.004318 | -4.985000 | -0.000886 |
| H | -0.808982 | -1.283323 | 0.639241  |
| H | -0.130831 | -1.276613 | -1.031027 |
| H | 0.978208  | -1.272803 | 0.390598  |

*PM7*

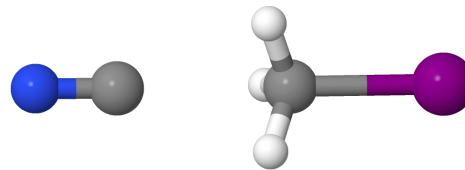

|   |           |           |           |
|---|-----------|-----------|-----------|
| C | -1.177500 | -0.002200 | -0.000300 |
| I | 1.026700  | -0.002200 | -0.000300 |
| C | -3.663100 | 0.003900  | -0.000300 |
| N | -4.828300 | 0.018900  | 0.003800  |
| H | -1.497600 | 0.459000  | 0.934400  |
| H | -1.497800 | 0.576800  | -0.867100 |
| H | -1.498200 | -1.042100 | -0.068300 |



#### 4. $\text{CN}^- \cdots \text{CH}_3\text{I}$

*DFT*

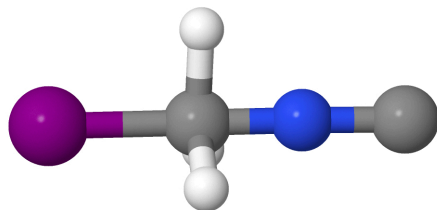

|   |           |           |           |
|---|-----------|-----------|-----------|
| C | 0.011322  | 0.893955  | 0.000066  |
| N | 0.018826  | 2.085718  | 0.000141  |
| C | -0.022369 | 3.266549  | -0.000160 |
| I | -0.001911 | -0.800983 | -0.000012 |
| H | 0.673654  | 0.957558  | 0.849240  |
| H | 0.416545  | 0.959603  | -0.997597 |
| H | -1.054434 | 0.971904  | 0.148554  |

*PM7*

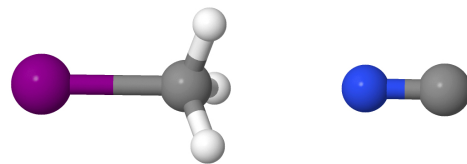

|   |           |           |           |
|---|-----------|-----------|-----------|
| C | 0.592801  | 0.025620  | 0.016500  |
| N | 3.262761  | 0.056829  | 0.004712  |
| C | 4.435193  | 0.063395  | -0.011326 |
| I | -1.563681 | -0.001203 | 0.024542  |
| H | 0.951498  | 1.014953  | 0.313670  |
| H | 0.961749  | -0.203699 | -0.987027 |
| H | 0.974654  | -0.720638 | 0.718701  |

5.  $[\text{NC}\cdots\text{CH}_3\cdots\text{I}]^{\ddagger-}$

*DFT*

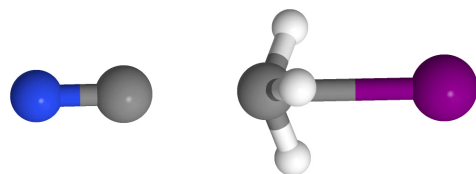

|   |           |           |           |
|---|-----------|-----------|-----------|
| C | 0.010044  | 1.281602  | 0.000121  |
| I | -0.001094 | -1.138373 | -0.000031 |
| C | 0.001171  | 3.206122  | 0.001391  |
| N | -0.006314 | 4.381493  | -0.000931 |
| H | 0.584832  | 0.913746  | 0.859202  |
| H | 0.469427  | 0.915384  | -0.926499 |
| H | -1.019374 | 0.907865  | 0.066398  |

*PM7*

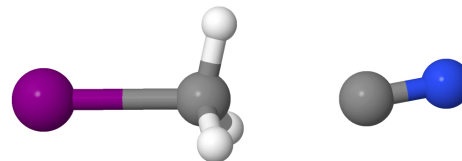

|   |           |           |           |
|---|-----------|-----------|-----------|
| C | 1.266600  | -0.014400 | -0.002000 |
| C | 3.578700  | -0.014400 | -0.002000 |
| N | 4.693700  | 0.317500  | -0.002000 |
| I | -1.012700 | -0.032000 | 0.000700  |
| H | 1.517900  | -1.070000 | 0.058900  |
| H | 1.507900  | 0.460300  | -0.949000 |
| H | 1.510300  | 0.567700  | 0.881500  |

6.  $[\text{NC}\cdots\text{H}\cdots\text{CH}_2\text{I}]^{\ddagger-}$

*DFT*

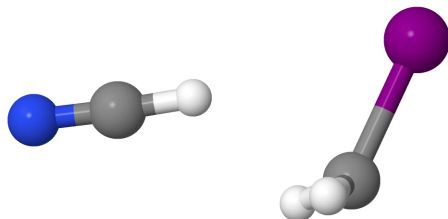

|   |           |           |           |
|---|-----------|-----------|-----------|
| C | 1.491674  | -0.323928 | -0.031037 |
| I | -0.160288 | 1.034670  | -0.004858 |
| C | -0.185558 | -3.157253 | 0.112969  |
| N | -0.360330 | -4.284814 | -0.087421 |
| H | -0.065859 | -2.143857 | 0.321668  |
| H | 1.738386  | -0.785758 | 0.956139  |
| H | 1.508332  | -1.027122 | -0.899997 |

*PM7*

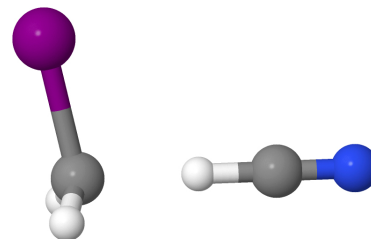

|   |           |           |           |
|---|-----------|-----------|-----------|
| C | -0.130000 | 0.290000  | 0.011000  |
| I | 1.965000  | 0.290000  | 0.011000  |
| C | -0.720000 | 3.143000  | 0.011000  |
| N | -0.955000 | 4.276000  | 0.014000  |
| H | -0.557000 | 0.001000  | 0.922000  |
| H | -0.560000 | -0.016000 | -0.893000 |
| H | -0.487000 | 2.018000  | 0.014000  |

7.  $[\text{CN}\cdots\text{CH}_3\cdots\text{I}]^{\ddagger-}$

*DFT*

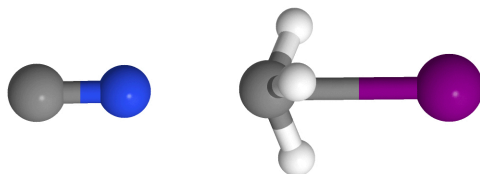

|   |           |           |           |
|---|-----------|-----------|-----------|
| C | 0.009793  | 1.297274  | 0.000089  |
| I | -0.001063 | -1.122702 | -0.000030 |
| N | 0.000690  | 3.221793  | 0.001258  |
| C | -0.006923 | 4.397164  | -0.001133 |
| H | 0.581064  | 0.929514  | 0.861552  |
| H | 0.473048  | 0.931081  | -0.924611 |
| H | -1.019848 | 0.923420  | 0.062118  |

*PM7*

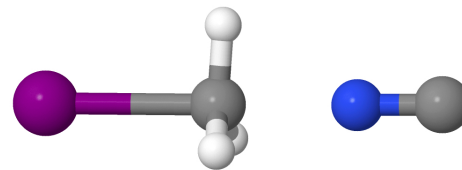

|   |           |           |           |
|---|-----------|-----------|-----------|
| C | -0.591184 | 0.946260  | -1.561025 |
| N | 0.506022  | 0.907928  | -3.131070 |
| C | 1.169133  | 0.895947  | -4.080874 |
| I | -1.961904 | 1.011623  | 0.394666  |
| H | -0.065343 | 1.874099  | -1.317979 |
| H | -1.437745 | 0.970461  | -2.252982 |
| H | -0.131060 | -0.013534 | -1.310669 |

8.  $[\text{CN}\cdots\text{H}\cdots\text{CH}_2\text{I}]^{\dagger-}$

*DFT*

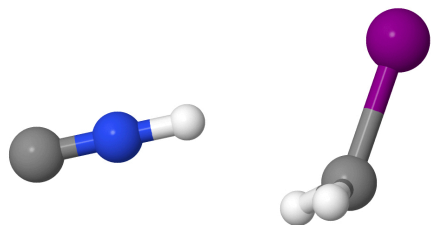

|   |           |           |           |
|---|-----------|-----------|-----------|
| C | 1.487571  | -0.344566 | -0.030583 |
| I | -0.158680 | 1.020947  | -0.004444 |
| N | -0.201997 | -3.171157 | 0.101026  |
| C | -0.381052 | -4.297376 | -0.103096 |
| H | 1.729905  | -0.810323 | 0.955834  |
| H | 1.503377  | -1.045282 | -0.901558 |
| H | -0.048369 | -2.204848 | 0.276165  |

*PM7*

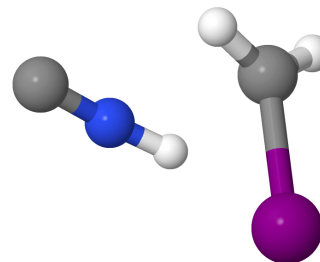

|   |           |           |           |
|---|-----------|-----------|-----------|
| C | 1.373000  | -0.752000 | 0.072000  |
| I | -0.010000 | 0.794000  | 0.058000  |
| N | -0.776000 | -3.421000 | 1.093000  |
| C | -0.735000 | -4.003000 | 0.070000  |
| H | 1.800000  | -0.994000 | 0.979000  |
| H | 1.634000  | -1.150000 | -0.846000 |
| H | -0.714000 | -2.820000 | 1.845000  |

9.  $\text{CNCH}_3 \cdots \text{I}^-$

*DFT*

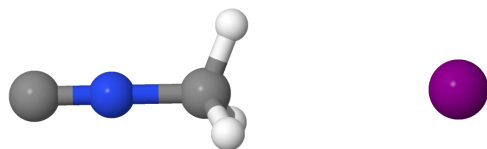

|   |           |           |           |
|---|-----------|-----------|-----------|
| C | 0.002052  | 2.385868  | 0.000103  |
| N | 0.002824  | 3.813845  | 0.000140  |
| C | -0.001402 | 4.987443  | -0.000068 |
| I | 0.000065  | -1.452315 | 0.000006  |
| H | -0.490692 | 2.032635  | -0.915771 |
| H | -0.563850 | 2.032676  | 0.872710  |
| H | 1.027430  | 1.970617  | 0.041567  |

*PM7*

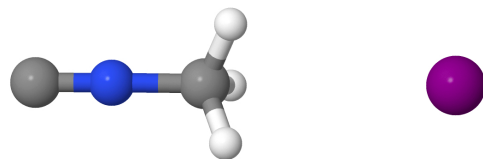

|   |           |           |           |
|---|-----------|-----------|-----------|
| C | -0.479202 | -1.966555 | -0.233958 |
| N | 0.272163  | -3.110156 | 0.174389  |
| C | 0.886132  | -4.052944 | 0.508369  |
| I | -2.498692 | 1.107320  | -1.331502 |
| H | -1.446704 | -1.975159 | 0.285908  |
| H | -0.651798 | -2.025339 | -1.317096 |
| H | 0.046776  | -1.020410 | -0.002206 |

jmol

10.  $\text{NCCH}_3 \cdots \text{I}^-$

*DFT*

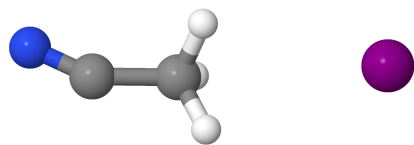

|   |           |           |           |
|---|-----------|-----------|-----------|
| C | 0.232579  | 2.218078  | 0.000000  |
| C | 0.230132  | 3.673354  | 0.000000  |
| N | -0.320144 | 4.715552  | 0.000000  |
| I | -0.022185 | -1.393277 | 0.000000  |
| H | -0.294101 | 1.852122  | 0.886736  |
| H | 1.228767  | 1.781988  | 0.000000  |
| H | -0.294101 | 1.852122  | -0.886736 |

*PM7*

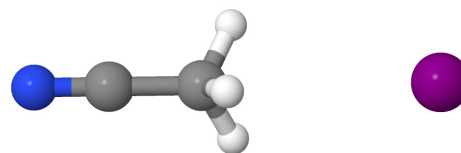

|   |           |           |           |
|---|-----------|-----------|-----------|
| C | 2.453700  | -0.000600 | -0.003400 |
| C | 3.884600  | -0.000600 | -0.003400 |
| N | 5.044100  | -0.000300 | -0.003400 |
| I | -1.204600 | 0.000200  | 0.001100  |
| H | 2.013800  | -0.799800 | 0.628900  |
| H | 2.014000  | -0.148600 | -1.011700 |
| H | 2.014200  | 0.946700  | 0.372700  |

# 11. CH<sub>3</sub>CN

*DFT*

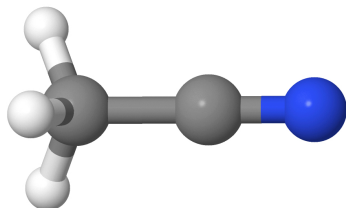

```
C -0.002421 1.238362 0.000000
C 0.000937 -0.224041 0.000000
H 1.027794 1.617285 0.000000
H -0.519279 1.612596 0.893218
H -0.519279 1.612596 -0.893218
N 0.002331 -1.384471 0.000000
```

*PM7*

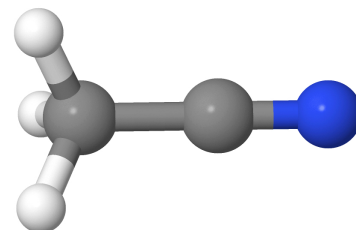

```
C -1.275100 0.000100 0.000000
C 0.162100 0.000100 0.000000
H -1.688400 1.027200 0.000000
H -1.688300 -0.513500 0.889600
H -1.688300 -0.513500 -0.889600
N 1.319000 -0.000200 -0.000000
```



## 12. CH<sub>3</sub>NC

*DFT*

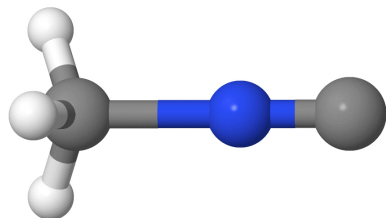

|   |           |           |           |
|---|-----------|-----------|-----------|
| C | -0.002330 | 1.302951  | 0.000000  |
| N | 0.008183  | -0.443788 | 0.000000  |
| H | 1.036771  | 1.639294  | 0.000000  |
| H | -0.524861 | 1.629895  | 0.901625  |
| H | -0.524861 | 1.629895  | -0.901625 |
| C | -0.005058 | -1.601712 | 0.000000  |

*PM7*

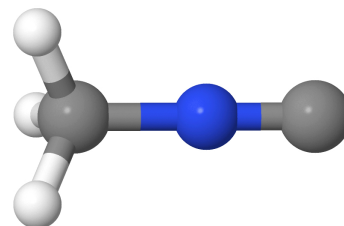

|   |           |           |           |
|---|-----------|-----------|-----------|
| C | -1.213900 | 0.000100  | -0.000000 |
| N | 0.204500  | 0.000100  | -0.000000 |
| H | -1.609900 | 1.035600  | -0.000000 |
| H | -1.609600 | -0.517800 | 0.896900  |
| H | -1.609600 | -0.517800 | -0.896900 |
| C | 1.380600  | -0.000200 | 0.000000  |

### 13. HCN

*DFT*

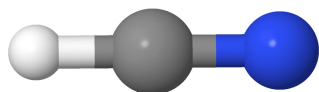

```
C 0.000000 0.000000 -0.502975  
N 0.000000 0.000000 0.654180  
H 0.000000 0.000000 -1.561407
```

*PM7*

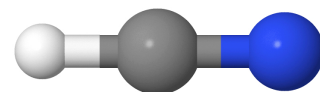

```
C 0.008000 0.011000 0.000000  
N 1.162000 0.011000 0.000000  
H -1.036000 0.013000 0.000000
```

### 14. HNC

*DFT*

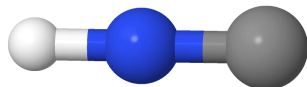

```
C 0.000000 0.000000 -0.732696  
N 0.000000 0.000000 0.424450  
H 0.000000 0.000000 1.425026
```

*PM7*

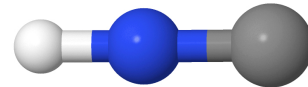

```
C -0.014208 0.028657 0.000000  
N 1.166180 0.028657 0.000000  
H 2.129370 0.032352 0.000000
```

15.  $\text{CH}_2\text{I}^-$

*DFT*

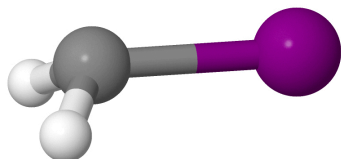

C 0.073540 -1.826604 0.000000  
 I 0.004053 0.293354 0.000000  
 H -0.328027 -2.294081 0.976592  
 H -0.328027 -2.294081 -0.976592

*PM7*

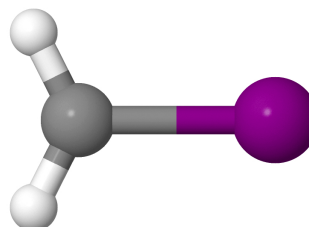

C 0.229634 -0.001234 0.010442  
 I 2.304750 -0.001234 0.010442  
 H -0.236930 0.919680 0.010442  
 H -0.236789 -0.921743 0.012872

16.  $\text{NC}^- \cdots \text{HCH}_2\text{I}$

*DFT*

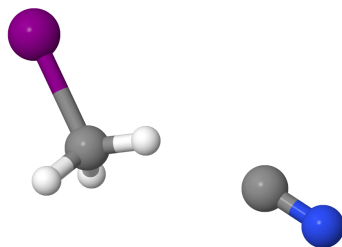

C 1.25653 0.42599 -0.00354  
 H 1.87873 0.44440 0.89503  
 H 0.50893 1.23671 0.00201  
 H 1.86633 0.44599 -0.91053  
 I 0.24883 -1.51354 0.00170  
 C -0.11349 3.42838 0.00182  
 N -0.20945 4.60561 0.00102

*PM7*

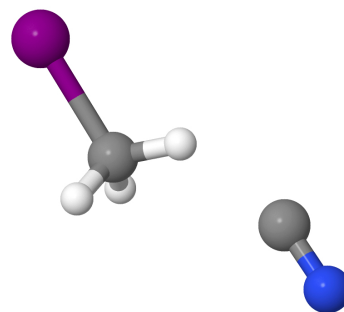

C 0.301519 0.400994 0.460560  
 H 1.390429 0.400994 0.460560  
 H -0.052667 1.468475 0.460560  
 H -0.103144 -0.094383 -0.417761  
 I -0.357211 -0.646190 2.227900  
 C 0.326864 3.111556 -0.756451  
 N 0.769482 3.794943 -1.594395

17.  $\text{CN}^- \cdots \text{HCH}_2\text{I}$

*DFT*

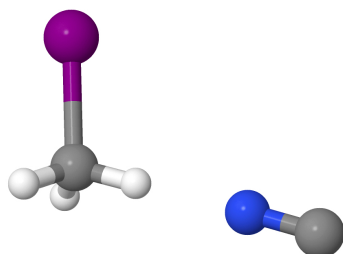

|   |          |          |          |
|---|----------|----------|----------|
| C | 1.25653  | 0.42599  | -0.00354 |
| H | 1.87873  | 0.44440  | 0.89503  |
| H | 0.50893  | 1.23671  | 0.00201  |
| H | 1.86633  | 0.44599  | -0.91053 |
| I | 0.24883  | -1.51354 | 0.00170  |
| C | -0.11349 | 3.42838  | 0.00182  |
| N | -0.20945 | 4.60561  | 0.00102  |

*PM7*

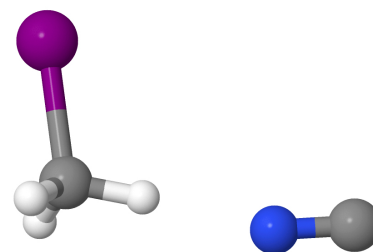

|   |           |           |           |
|---|-----------|-----------|-----------|
| C | -0.040865 | -0.006590 | 0.023352  |
| H | 1.043856  | -0.006590 | 0.023352  |
| H | -0.410490 | 1.066475  | 0.023352  |
| H | -0.463601 | -0.513237 | -0.836230 |
| I | -0.698834 | -0.964851 | 1.817725  |
| N | -1.070607 | 2.920183  | -0.098166 |
| C | -1.633746 | 3.920138  | 0.136384  |
